# Supplementary material
Source: PubMed Central journal article supplement (PMC7610489)
Supplement: EMS118387-supplement-Supplementary_Information.pdf [file EMS118387-supplement-Supplementary_Information.pdf]

**Supplementary Figure 1 Sequence alignments for RagA from W83 and ATCC 33277.**

The secondary structure assignment based on the RagAB W83 crystal structure is indicated. The positions of the site-directed mutants made are indicated with blue bars. Only the transmembrane  $\beta$ -strands are numbered in RagA. The image was produced by ESPript 3.0<sup>1</sup>. Sequence alignment was performed using Clustal Omega<sup>2</sup>.

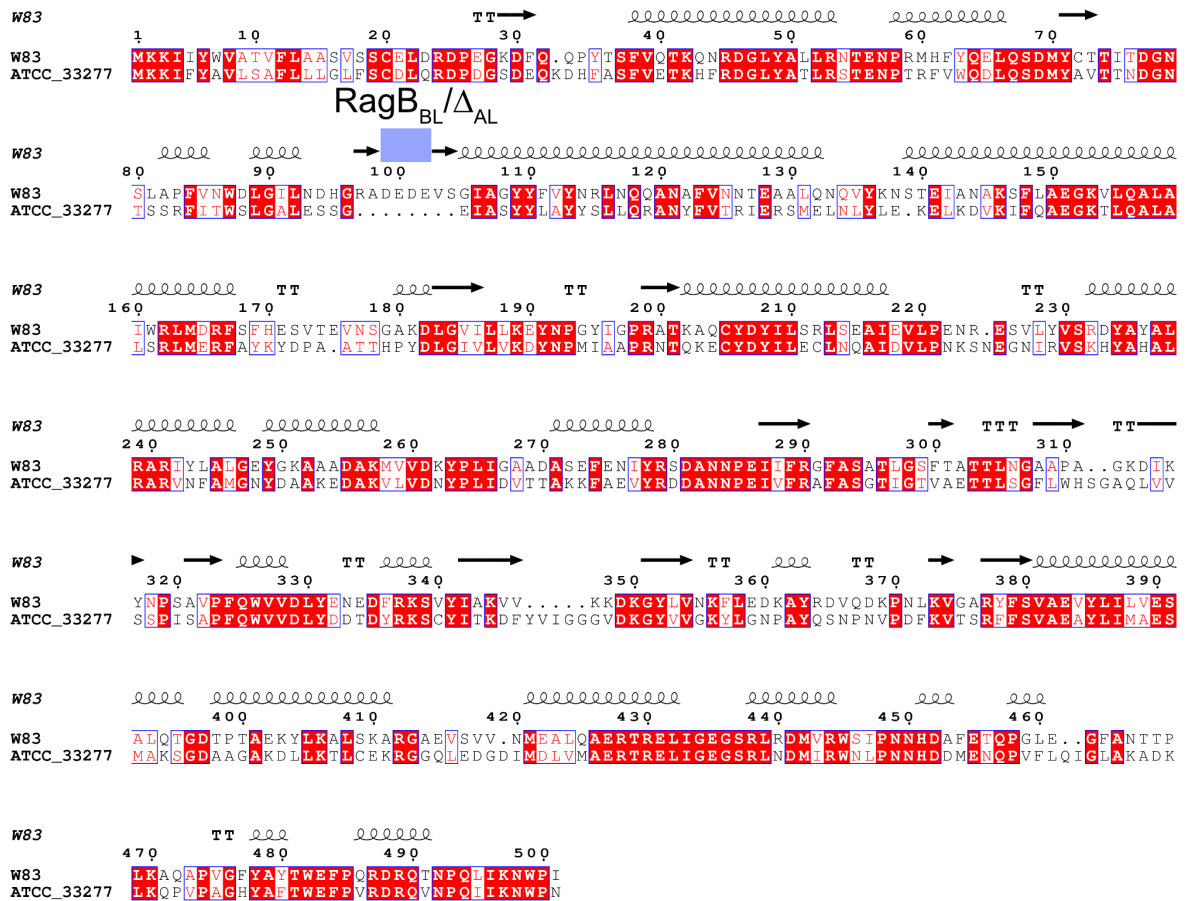

**Supplementary Figure 2** Sequence alignments for RagB from W83 and ATCC 33277.

The secondary structure assignment based on the RagAB W83 crystal structure is indicated.

The positions of the site-directed mutants made are indicated with blue bars. The image was

produced by ESPrnt 3.0<sup>1</sup>. Sequence alignment was performed using Clustal Omega<sup>2</sup>.

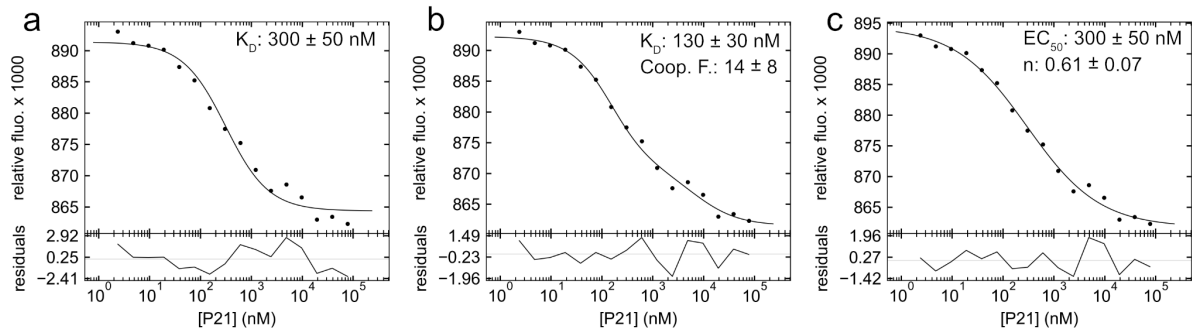

**Supplementary Figure 3 Additional analysis of MST data.** MST profiles for unlabelled P21 binding to His-tag labelled RagAB W83 with fitted line from a 1:1 model (a), a 1:2 Macro model<sup>3</sup> (b) and the Hill model (c). The residuals between the data and the fit line are indicated in the bottom panel. Experiments and listed  $K_D$  and  $EC_{50}$  values represent the mean of three independent experiments  $\pm$  SD. Cooperativity factor (Coop. F.) and  $n$  factor were used to determine the mode of cooperativity. Data were analysed in PALMIST version 1.4.04<sup>3</sup>. MST figures were rendered using GUSSE<sup>4</sup>. Statistical analysis was performed using the F-test, with  $p$ -values  $< 0.05$  considered significant. The fits for the 1:2 Macro model and the Hill model are both better than the 1:1 model, with  $p$ -values of 0.0009 and 0.0002, respectively. The goodness-of-fits of the 1:2 Macro model and Hill model are statistically indistinguishable ( $p$ -value = 0.57).

**Supplementary Movie** Dynamics of the RagAB transporter. Cryo-EM map of open-closed (OC) RagAB, with cartoon models shown for RagA (blue) and RagB (yellow or grey) subunits.

**Supplementary Table 1 Crystallographic data collection and refinement statistics**

|                                                         | W83-KRAB          | W83-wild type                                 | W83-wild type<br>+ P21                        |
|---------------------------------------------------------|-------------------|-----------------------------------------------|-----------------------------------------------|
| <b>Data collection<sup>#</sup></b>                      |                   |                                               |                                               |
| Space group                                             | C222 <sub>1</sub> | P2 <sub>1</sub> 2 <sub>1</sub> 2 <sub>1</sub> | P2 <sub>1</sub> 2 <sub>1</sub> 2 <sub>1</sub> |
| Cell dimensions                                         |                   |                                               |                                               |
| <i>a</i> , <i>b</i> , <i>c</i> (Å)                      | 191, 377, 369     | 131, 142, 242                                 | 130, 143, 250                                 |
| $\alpha$ , $\beta$ , $\gamma$ (°)                       | 90, 90, 90        | 90, 90, 90                                    | 90, 90, 90                                    |
| Resolution (Å)                                          | 83.9-3.38         | 80.5-3.04                                     | 142.7-2.61                                    |
|                                                         | (3.44-3.38)*      | (3.09-3.04)                                   | (2.65-2.61)                                   |
| <i>R</i> <sub>pim</sub>                                 | 8.4 (44.9)        | 15.7 (55.8)                                   | 10.2 (75.2)                                   |
| <i>I</i> / $\sigma$ <i>I</i>                            | 8.5 (2.0)         | 3.7 (1.3)                                     | 5.6 (1.0)                                     |
| Completeness (%)                                        | 99.6 (100)        | 100 (99.5)                                    | 99.9 (96.8)                                   |
| Redundancy                                              | 7.6 (8.1)         | 7.4 (7.6)                                     | 7.3 (7.6)                                     |
| <b>Refinement</b>                                       |                   |                                               |                                               |
| Resolution (Å)                                          | 83.9-3.38         | 71.0-3.04                                     | 124.0-2.61                                    |
| No. reflections                                         | 184,138           | 86,882                                        | 140,898                                       |
| <i>R</i> <sub>work</sub> / <i>R</i> <sub>free</sub> (%) | 20.5/25.5         | 22.3/29.3                                     | 20.7/26.4                                     |
| No. atoms                                               |                   |                                               |                                               |
| Protein (RagA/RagB)                                     | 7048/3839         | 7069/3838                                     | 7064/3834                                     |
| Peptide                                                 | 95                | 72                                            | 72                                            |
| Water                                                   | -                 | -                                             | -                                             |
| <i>B</i> -factors                                       |                   |                                               |                                               |
| Protein (RagA/RagB)                                     | 89/66             | 44/37                                         | 57/50                                         |
| Peptide                                                 | 95                | 72                                            | 72                                            |
| Water                                                   | -                 | -                                             | -                                             |
| R.m.s. deviations                                       |                   |                                               |                                               |
| Bond lengths (Å)                                        | 0.011             | 0.011                                         | 0.008                                         |
| Bond angles (°)                                         | 1.37              | 1.33                                          | 1.03                                          |

<sup>#</sup> One crystal was used for each data collection.

\* Values in parentheses are for highest-resolution shell.

**Supplementary Table 2** RagAB peptidomics and *in vitro* binding of peptides to RagAB and RagB. Both analyses contain two separate Excel spreadsheets: all information retrieved from Mascot (Mascot) and a reduced spreadsheet with summed spectra (duplicates) and one charge variant of each peptide (Spectral C.) For spectral C., additional statistics were calculated: Spectral count peptide - summed number of spectra of particular peptide; Spectral count protein - summed number of spectra per particular protein; Spectral count sample - summed number of spectra per particular sample; Ratio peptide/protein - ratio of total number of particular peptide spectra to total number of spectra per protein; Ratio peptide/sample - ratio of total number of particular peptide spectra to total number of spectra per protein.

**Supplementary Table 3 Cryo-EM data collection, refinement and validation statistics**

|                                                      | RagAB (CC)<br>(EMD-10241)<br>(PDB 6SM3) | RagAB (OC)<br>(EMD-10245)<br>(PDB 6SMQ) | RagAB (OO)<br>(EMD-10243)<br>(PDB 6SML) |
|------------------------------------------------------|-----------------------------------------|-----------------------------------------|-----------------------------------------|
| <b>Data collection and processing</b>                |                                         |                                         |                                         |
| Magnification                                        | 130,000 x                               | 130,000 x                               | 130,000 x                               |
| Voltage (kV)                                         | 300                                     | 300                                     | 300                                     |
| Electron exposure (e-/Å <sup>2</sup> )               | 77.88                                   | 77.88                                   | 77.88                                   |
| Defocus range (μm)                                   | -1.2 to -3.0                            | -1.2 to -3.0                            | -1.2 to -3.0                            |
| Pixel size (Å)                                       | 1.07                                    | 1.07                                    | 1.07                                    |
| Symmetry imposed                                     | C2                                      | C1                                      | C2                                      |
| Initial particle images pre-classification<br>(no.)  | 491,870                                 | 491,870                                 | 491,870                                 |
| Initial particle images post-classification<br>(no.) | 87,897                                  | 218,052                                 | 52,754                                  |
| Final particle images (no.)                          | 86,877                                  | 213,143                                 | 51,849                                  |
| Map resolution (Å)                                   | 3.3                                     | 3.3                                     | 3.4                                     |
| FSC threshold 0.143                                  |                                         |                                         |                                         |
| Map resolution range (Å)                             | 4.26-3.14                               | 4.10-3.11                               | 4.49-3.21                               |
| <b>Refinement</b>                                    |                                         |                                         |                                         |
| Initial model used (PDB code)                        | 6SLI                                    | 6SLI                                    | 6SLI                                    |
| Model resolution (Å)                                 | 3.2                                     | 3.2                                     | 3.4                                     |
| FSC threshold                                        | 0.5                                     | 0.5                                     | 0.5                                     |
| Model resolution range (Å)                           | ∞ - 3.2                                 | ∞ - 3.2                                 | ∞ - 3.4                                 |
| Map sharpening <i>B</i> factor (Å <sup>2</sup> )     | -120                                    | -114.1                                  | -119.9                                  |
| Model composition                                    |                                         |                                         |                                         |
| Non-hydrogen atoms protein                           | 11,020                                  | 22,136                                  | 11,076                                  |
| Non-hydrogen atoms peptide ligand                    | 79                                      | 82                                      | 65                                      |
| Protein residues                                     | 1,398                                   | 2,791                                   | 1,405                                   |
| <i>B</i> factors (Å <sup>2</sup> )                   |                                         |                                         |                                         |
| Protein                                              | 30.85                                   | 36.50                                   | 40.29                                   |
| Peptide                                              | 30.37                                   | 26.53                                   | 46.22                                   |
| R.m.s. deviations                                    |                                         |                                         |                                         |
| Bond lengths (Å)                                     | 0.009                                   | 0.011                                   | 0.009                                   |
| Bond angles (°)                                      | 0.938                                   | 0.998                                   | 0.996                                   |
| Validation                                           |                                         |                                         |                                         |
| MolProbity score                                     | 1.50                                    | 1.59                                    | 1.59                                    |
| Clashscore                                           | 2.45                                    | 3.32                                    | 3.67                                    |
| Poor rotamers (%)                                    | 0.26                                    | 0.34                                    | 0.09                                    |
| Ramachandran plot                                    |                                         |                                         |                                         |
| Favored (%)                                          | 92.39                                   | 92.44                                   | 93.27                                   |
| Allowed (%)                                          | 7.61                                    | 7.38                                    | 6.66                                    |
| Disallowed (%)                                       | 0                                       | 0.18                                    | 0.07                                    |

**Supplementary Table 4** Primers, plasmids and strains used in this study.

| <b>Name</b>                                     | <b>Sequence (5'→3')</b>                          |
|-------------------------------------------------|--------------------------------------------------|
| <b>Primers</b>                                  |                                                  |
| <b>RagBall plasmid</b>                          |                                                  |
| RagB_A_KpnI_F                                   | ATTGGTACCATGAAAAAATAATTTATTGGGTTG                |
| RagB_A_BamHI_R                                  | ATAGGATCCTTATATCGGCCAGTTCTTTATTAAC               |
| RagB_tet_BamHI_F                                | ATAGGATCCACAACGAATTATCTCCTTAACGTACG              |
| RagB_tet_XbaI_R                                 | TCGTCTAGATTTTATTGCCAAGTTCTAATGCTTCT              |
| RagB_B_XbaI_F                                   | TGCTCTAGATTTAGTTGTAGATCTTACTATGAAA               |
| RagB_B_SphI_R                                   | CATGCATGCACAAAGATAAGATATCTGCC                    |
| <b>RagAall plasmid</b>                          |                                                  |
| RagA_A_SmaI_F                                   | GTACCCGGGTGAAAAAAGGATAATAGGATTAGTCT              |
| RagA_A_NdeI_R                                   | TATCATATGTTAGAAAAGACAACCTGAATACCCGC              |
| RagA_erm_NdeI_F                                 | TAACATATGATAGCTTCCGCTATTGCTTTTTTTG               |
| RagA_erm_XhoI_R                                 | ATCCTCGAGTCTAGAGGATCCCCGAAGCTG                   |
| RagA_B_XhoI_F                                   | AGACTCGAGGATTTACTTATTCTTAAGAAACATTTGATATGAA      |
| RagA_B_Sall_R                                   | CAGGTCGACGAAAGGGACTGCGCTCGG                      |
| <b>RagB-8His plasmid</b>                        |                                                  |
| RagB_8H_FI                                      | CACCATCACCATCACCATCACCATTAAGGATCCACAACGAATTATCTC |
| RagB_8H_Fs                                      | TAAGGATCCACAACGAATTATCTC                         |
| RagB_8H_RI                                      | ATGGTGATGGTGATGGTGATGGTGATCGGCCAGTTCTTTATTAAGT   |
| RagB_8H_Rs                                      | TATCGGCCAGTTCTTTATTAAGT                          |
| <b><math>\Delta</math>ragB plasmid</b>          |                                                  |
| delRagB_KpnI_F                                  | CAGTGGTACCCCAATTCGTTCTATATGGCT                   |
| delRagB_BamHI_R                                 | GTTGTGGATCCATCAAATGTTTCTTAAGAATAAGTAAATC         |
| <b><math>\Delta</math>ragA plasmid</b>          |                                                  |
| delRagA_A_F                                     | TGAATTCGAGCTCGGTACCCGACACGAAGGAGTTTATTGCG        |
| delRagA_A_R                                     | AAAGCAATAGCGGAAGCTATTCTAAGCAATTTGCTCACCATAC      |
| delRagA_erm_F                                   | TGGTGAGCAAATTGCTTAGAATAGCTTCCGCTATTGCTTTTTT      |
| delRagA_erm_R                                   | TTCTTAAGAATAAGTAAATCTCTAGAGGATCCCCGAAGCT         |
| delRagA_B_F                                     | GCTTCGGGGATCCTCTAGAGATTTACTTATTCTTAAGAAACATTTGAT |
| delRagA_B_R                                     | GTGCACTCTAGAGGATCCCCTTTGTGATCTCGCTGTG            |
| <b><math>\Delta</math>ragAB plasmid</b>         |                                                  |
| delRagAB_KpnI_F                                 | CAGTGGTACCGACACGAAGGAGTTTATTGCG                  |
| delRagAB_BamHI_R                                | GTTGTGGATCCTCTAAGCAATTTGCTCACCATAC               |
| <b>RagB<sub>BL</sub> plasmid</b>                |                                                  |
| RagB_DEDEloop_FI                                | GGACGTGCTCGTAAGCGTAAGGTCTCCGGTATAGCTGGCTACTATT   |
| RagB_DEDEloop_RI                                | GGAGACCTTACGCTTACGAGCACGTCCATGGTCGTTA            |
| RagB_DEDEloop_Fs                                | GTCTCCGGTATAGCTGGCTACTATT                        |
| RagB_DEDEloop_Rs                                | AGCACGTCCATGGTCGTTA                              |
| <b><math>\Delta</math><sub>AL</sub> plasmid</b> |                                                  |
| RagB_delAcLoop_FI                               | GGCATACTTAACGACCATGGAGGTATAGCTGGCTACTATTTTCGTAT  |
| RagB_delAcLoop_RI                               | GAAATAGTAGCCAGCTATACCTCCATGGTCGTTAAGTATGC        |
| RagB_delAcLoop_Fs                               | GGTATAGCTGGCTACTATTTTCGTAT                       |
| RagB_delAcLoop_Rs                               | TCCATGGTCGTTAAGTATGC                             |
| <b>RagAB<sub>mono</sub> plasmid</b>             |                                                  |
| RagAmono6H_FI                                   | GCCAGCATCATCATCATCATGGAAAAACCGGAAATAGTTTG        |
| RagAmono6H_RI                                   | TTCCATGATGATGATGATGATGCTGGCTCAGTAACATCAACTTATC   |
| RagAmono6H_Fs                                   | GGAAAAACCGGAAATAGTTTG                            |
| RagAmono6H_Rs                                   | CTGGCTCAGTAACATCAACTTATC                         |
| <b><math>\Delta</math>hinge1 plasmid</b>        |                                                  |
| RagBdelHinge1_FI                                | GAGATTGGTAATTACAACCACAATCCCGACCTCTCGTGG          |
| RagBdelHinge1_RI                                | TCCCACGAGAGGTCCGGATTGTGGTTGTAATTACCAATCTCCGAG    |
| RagBdelHinge1_Fs                                | AATCCCGACCTCTCGTGG                               |
| RagBdelHinge1_Rs                                | GTGGTTGTAATTACCAATCTCCGAG                        |
| <b><math>\Delta</math>hinge2 plasmid</b>        |                                                  |
| RagBdelHinge2_FI                                | CGCACTACGAATGATATGGGCGTAGGCTCTATGAAAAATACGGG     |
| RagBdelHinge2_RI                                | ATTTTTCATAGAGCCTACGCCATATCATTTCGTAGTGCGGAC       |
| RagBdelHinge2_Fs                                | GTAGGCTCTATGAAAAATACGGG                          |
| RagBdelHinge2_Rs                                | CATATCATTTCGTAGTGCGGAC                           |
| <b><math>\Delta</math>TonB plasmid</b>          |                                                  |
| RagAdelTonB_FI                                  | GTAAGTGGATCCGGACTCTAAGGGTACGGGACAGAACTCAG        |
| RagAdelTonB_RI                                  | GCTGAGTTTCTGTCCCGTACCCTTAGAGTCCGGATCCAGTACC      |
| RagAdelTonB_Fs                                  | GGTACGGGACAGAACTCAG                              |
| RagAdelTonB_Rs                                  | CCTTAGAGTCCGGATCCAGTACC                          |



**RagB W83 in ATCC plasmid**

ATCC\_RagB\_vect\_F ACAACGAATTATCTCCTTAACG  
 ATCC\_RagB\_vect\_R AATGATTTACTGTTAATCGTTAGTAC  
 RagBW83inATCC\_F ACGATTAACAGTAAATCATTATGAAAAAATAATTTATTGGGTTGC  
 RagBW83inATCC\_R TAAGGAGATAATTCGTTGTTTATATCGGCCAGTTCTTTATTAAC

 **$\Delta$ ragB-ATCC plasmid**

delRagB\_ATCC\_A\_F TGAATTCGAGCTCGGTACCCTTTTTGGAACAATCGTTTTG  
 delRagB\_ATCC\_A\_R TTAAGGAGATAATTCGTTGTAATGATTTACTGTTAATCGTTAGTACTC  
 delRagB\_ATCC\_tet\_F ACGATTAACAGTAAATCATTACAACGAATTATCTCCTTAACGTACG  
 delRagB\_ATCC\_tet\_R CGTCGAAACATCTAATTGAATTTATTGCCAAGTTCTAATGCTTC  
 delRagB\_ATCC\_B\_F ATTAGAACTTGGCAATAAAATTCAATTAGATGTTTCGACG  
 delRagB\_ATCC\_B\_R GTCGACTCTAGAGGATCCCCTACGGAGAACATATGTTCC

 **$\Delta$ ragAB-ATCC plasmid**

delRagAB\_ATCC\_A\_F TGAATTCGAGCTCGGTACCCTTTCCGTCTCTCTTATGACGAAGAG  
 delRagAB\_A\_R TTAAGGAGATAATTCGTTGTTCTAAGCAATTTGCTCACCATAC  
 delRagAB\_ATCC\_tet\_F TGGTGAGCAAATTGCTTAGA ACAACGAATTATCTCCTTAACGTAC  
 delRagAB\_ATCC\_tet\_R CGTCGAAACATCTAATTGAATTTATTGCCAAGTTCTAATGCTTC  
 delRagAB\_ATCC\_B\_F ATTAGAACTTGGCAATAAAATTCAATTAGATGTTTCGACG  
 delRagAB\_ATCC\_B\_R GTCGACTCTAGAGGATCCCCTACGGAGAACATATGTTCC

**RagAB-W83-pTIO plasmid**

RagAB\_W\_pTIO\_F GCAGCCC GGTTGGCGCGAGAAGTAAAAAATC  
 RagAB\_W\_pTIO\_R CCGCTCTAGATTATATCGGCCAGTTCTTTATTAACG

 **$\Delta$ NTE plasmid**

RagAdelNTE\_FI GCTATGGCCCAGAATAGAACCGTTCTGGAGCAGGTAGTTGTAT  
 RagAdelNTE\_RI TACAACCTGCTCCAGAACGGTTCTATTCTGGGCCATAG  
 RagAdelNTE\_Fs GTTCTGGAGCAGGTAGTTGTAT  
 RagAdelNTE\_Rs ACGGTTCTATTCTGGGCCATAG

**Plasmids**

| Plasmid               | Relevant features                                                                                                                              | Source            |
|-----------------------|------------------------------------------------------------------------------------------------------------------------------------------------|-------------------|
| pUC19                 | <i>E. coli</i> cloning vector, Ap <sup>R</sup>                                                                                                 | Thermo Scientific |
| pTIO-1                | <i>E. coli</i> - <i>Bacteroides</i> shuttle vector, Ap <sup>R</sup>                                                                            | 5                 |
| RagBall               | Master plasmid for RagB modifications, derivative of pUC19                                                                                     | This study        |
| RagB-8His             | Plasmid for insertion of 8xHis at C-terminal of RagB, used for purification of RagAB complex, derivative of RagBall,                           | This study        |
| $\Delta$ ragB         | Plasmid for deletion of <i>ragB</i> gene, derivative of RagBall                                                                                | This study        |
| $\Delta$ ragA         | Plasmid for deletion of <i>ragA</i> gene, derivative of RagAall                                                                                | This study        |
| $\Delta$ ragAB        | Plasmid for deletion of <i>ragA</i> and <i>ragB</i> genes, derivative of delRagB                                                               | This study        |
| RagAall               | Master plasmid for RagA modifications, derivative of pUC19                                                                                     | This study        |
| RagB <sub>BL</sub>    | Plasmid for substitution of D <sup>99</sup> -E <sup>102</sup> with RKRK in <i>ragB</i> gene, derivative of RagBall                             | This study        |
| $\Delta$ AL           | Plasmid for deletion of acidic loop R <sup>97</sup> -S <sup>104</sup> in <i>ragB</i> gene, derivative of RagBall                               | This study        |
| RagAB <sub>mono</sub> | Plasmid for insertion of 6xHis after Q <sup>570</sup> in <i>ragA</i> gene, derivative of RagAall                                               | This study        |
| $\Delta$ hinge1       | Plasmid for deletion of Q <sup>670</sup> -G <sup>691</sup> in <i>ragA</i> gene, derivative of RagAall                                          | This study        |
| $\Delta$ hinge2       | Plasmid for deletion of L <sup>731</sup> -N <sup>748</sup> and insertion of glycine in position 731 in <i>ragA</i> gene, derivative of RagAall | This study        |
| $\Delta$ TonB         | Plasmid for deletion of V <sup>100</sup> -Y <sup>109</sup> in <i>ragA</i> gene, derivative of RagAall                                          | This study        |
| $\Delta$ NTE          | Plasmid for deletion of V <sup>25</sup> -K <sup>99</sup> in <i>ragA</i> gene, derivative of RagAall                                            | This study        |
| RagB W83 in ATCC      | Plasmid for substitution of <i>ragB</i> from ATCC33277 with <i>ragB</i> from W83 strain                                                        | This study        |
| $\Delta$ ragB-ATCC    | Plasmid for deletion of <i>ragB</i> gene in ATCC33277 strain                                                                                   | This study        |
| $\Delta$ ragAB-ATCC   | Plasmid for deletion of <i>ragA</i> and <i>ragB</i> genes in ATCC33277 strain                                                                  | This study        |
| RagAB-W83-pTIO        | Shuttle plasmid for expression of <i>ragAB</i> genes from W83 strain                                                                           | This study        |

| <b>Strains</b>                             |                                                                                                                                                                                                             |                     |
|--------------------------------------------|-------------------------------------------------------------------------------------------------------------------------------------------------------------------------------------------------------------|---------------------|
| <b>Strain</b>                              | <b>Relevant genotype</b>                                                                                                                                                                                    | <b>Source</b>       |
|                                            | <b><i>E. coli</i></b>                                                                                                                                                                                       |                     |
| <b>DH5<math>\alpha</math></b>              | <i>fhuA2</i> $\Delta$ ( <i>argF-lacZ</i> )U169 <i>phoA glnV44</i> $\Phi$ 80 $\Delta$ ( <i>lacZ</i> )M15<br><i>gyrA96 recA1 relA1 endA1 thi-1 hsdR17</i>                                                     | New England Biolabs |
| <b>BL21 (DE3)</b>                          | <i>fhuA2 [lon] ompT gal</i> ( $\lambda$ DE3) [ <i>dcm</i> ] $\Delta$ <i>hsdS</i> $\lambda$ DE3 = $\lambda$ <i>sBamHI</i> $\Delta$ <i>EcoRI-B int::(lacI::PlacUV5::T7 gene1) i21</i><br>$\Delta$ <i>nin5</i> | Invitrogen          |
| <b>S-17 <math>\lambda</math>pir</b>        | <i>creC510 hsdR17 thiE1 endA1 recA1 LAMPir pro-82 RP4-2</i> ( <i>Km::Tn7, Tc::Mu-1</i> )                                                                                                                    | 6                   |
|                                            | <b><i>P. gingivalis</i></b>                                                                                                                                                                                 |                     |
| <b>W83</b>                                 | Wild type                                                                                                                                                                                                   | 7                   |
| <b>ATCC33277</b>                           | Wild type                                                                                                                                                                                                   | 8                   |
| <b>HG66</b>                                | Wild type                                                                                                                                                                                                   | 9                   |
| <b>A7436</b>                               | Wild type                                                                                                                                                                                                   | 10                  |
| <b>381</b>                                 | Wild type                                                                                                                                                                                                   | 11                  |
| <b>KRAB</b>                                | <i>rgpA rgpB kgp</i> (Cm <sup>R</sup> )(Em <sup>R</sup> )(Tet <sup>R</sup> )                                                                                                                                | 12                  |
| <b><math>\Delta</math>ragA</b>             | <i>ragA</i> (NCBI:PG_0185)(Em <sup>R</sup> )                                                                                                                                                                | This study          |
| <b><math>\Delta</math>ragB</b>             | <i>ragB</i> (NCBI:PG_0186)(Tet <sup>R</sup> )                                                                                                                                                               | This study          |
| <b><math>\Delta</math>ragAB</b>            | <i>ragA ragB</i> (Tet <sup>R</sup> )                                                                                                                                                                        | This study          |
| <b><math>\Delta</math>TonB</b>             | <i>ragA</i> $\Delta^{101-108}$ (Em <sup>R</sup> )                                                                                                                                                           | This study          |
| <b>RagAB<sub>mono</sub></b>                | <i>ragA</i> p.Q570_insHHHHHHH_G571 (Em <sup>R</sup> )                                                                                                                                                       | This study          |
| <b><math>\Delta</math>hinge1</b>           | <i>ragA</i> $\Delta^{670-691}$ (Em <sup>R</sup> )                                                                                                                                                           | This study          |
| <b><math>\Delta_{AL}</math></b>            | <i>ragB</i> $\Delta^{97-104}$ (Tet <sup>R</sup> )                                                                                                                                                           | This study          |
| <b>RagB<sub>BL</sub></b>                   | <i>ragB</i> p.D99R;E100K;D101R;E102K(Tet <sup>R</sup> )                                                                                                                                                     | This study          |
| <b><math>\Delta</math>NTE</b>              | <i>ragA</i> $\Delta^{25-99}$ (Em <sup>R</sup> )                                                                                                                                                             | This study          |
| <b><math>\Delta</math>hinge2</b>           | <i>ragA</i> $\Delta^{670-691}$ (Em <sup>R</sup> )                                                                                                                                                           | This study          |
| <b>RagB-8His</b>                           | <i>ragAp.L731G;<math>\Delta^{731-748}</math>;</i> (Em <sup>R</sup> )                                                                                                                                        | This study          |
| <b>RagB W83 in ATCC 33277</b>              | <i>ragB</i> (NCBI:PGN_0294); <i>ragB</i> (NCBI:PG_0186)(Tet <sup>R</sup> )                                                                                                                                  | This study          |
| <b><math>\Delta</math>ragAB ATCC 33277</b> | <i>ragA</i> (NCBI: PGN_0293); <i>ragB</i> (NCBI: PGN_0294)(Tet <sup>R</sup> )                                                                                                                               | This study          |
| <b>RagAB W83 in ATCC 33277</b>             | <i>ragA</i> (NCBI: PGN_0293); <i>ragB</i> (NCBI: PGN_0294)(Tet <sup>R</sup> )/ <i>ragA</i> (NCBI:PG_0185) <i>ragB</i> (NCBI:PG_0186) (Em <sup>R</sup> )                                                     | This study          |

## Supplementary references

1. Robert, X. & Gouet, P. Deciphering key features in protein structures with the new ENDscript server. *Nucleic Acids Res.* **42**, W320–324 (2014).
2. Madeira, F. et al. The EMBL-EBI search and sequence analysis tools APIs in 2019. *Nucleic Acids Res.* **47**, W636–W641 (2019).
3. Tso, S. C. et al. Using two-site binding models to analyze microscale thermophoresis data. *Anal Biochem.* **540-541**, 64–75 (2018).
4. Brautigam, C. A. Calculations and publication-quality illustrations for analytical ultracentrifugation data. *Methods Enzymol.* **562**, 109–133 (2015).
5. Tagawa, J. et al. Development of a novel plasmid vector pTIO-1 adapted for electrotransformation of *Porphyromonas gingivalis*. *J. Microbiol. Methods.* **105**, 174–179 (2014).
6. Edwards, A. N. et al. Circuitry linking the Csr and stringent response global regulatory systems. *Mol. Microbiol.* **80**, 1561–1580 (2011).
7. Nelson, K. E. et al. Complete genome sequence of the oral pathogenic bacterium *Porphyromonas gingivalis* strain W83. *J. Bacteriol.* **185**, 5591–5601 (2003).
8. Naito, M. et al. Determination of the genome sequence of *Porphyromonas gingivalis* strain ATCC 33277 and genomic comparison with strain W83 revealed extensive genome rearrangements in *P. gingivalis*. *DNA Res.* **15**, 215–225 (2008).
9. Potempa, J. & Nguyen, K. A. Purification and characterization of gingipains. *Curr. Protoc. Protein Sci.* **21**, 21.20 (2007).
10. Chastain-Gross, R. P. et al. Genome Sequence of *Porphyromonas gingivalis* strain A7436. *Genome Announc.* **3**, e00927–15 (2015).
11. Kennell, W. & Holt, S. C. Comparative studies of the outer membranes of *Bacteroides gingivalis*, strains ATCC 33277, W50, W83, 381. *Oral Microbiol. Immunol.* **5**, 121–130 (1990).
12. Grenier, D. et al. Role of gingipains in growth of *Porphyromonas gingivalis* in the presence of human serum albumin. *Infect. Immun.* **69**, 5166–5172 (2001).
