# Supplementary material
Source: PubMed Central journal article supplement (PMC7610489)

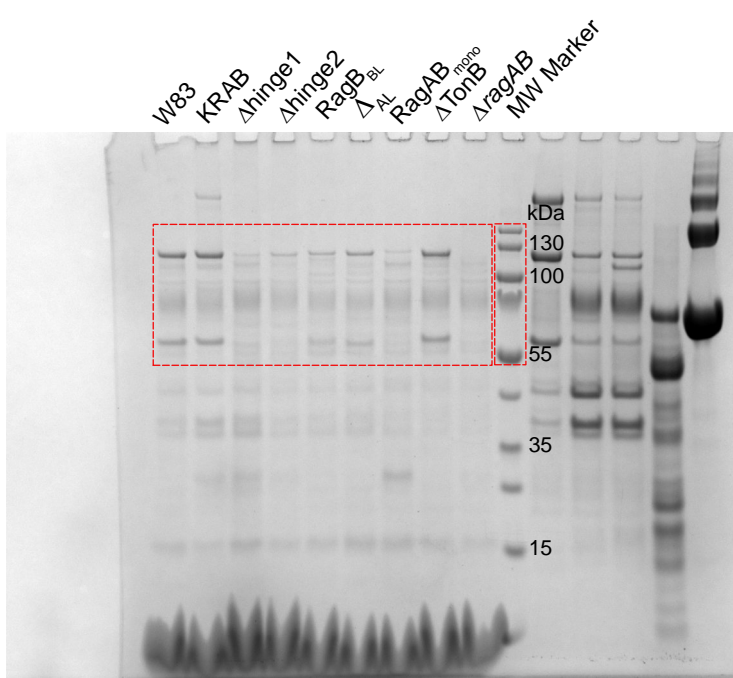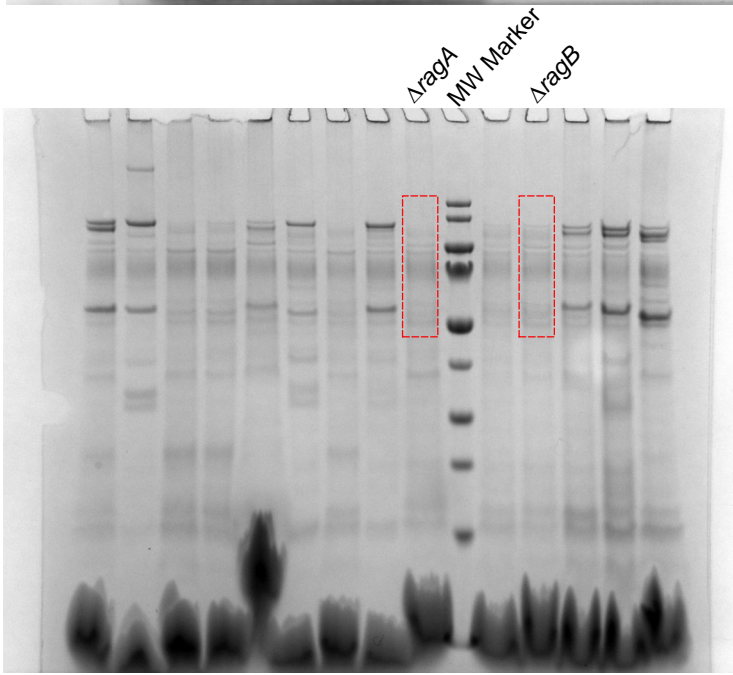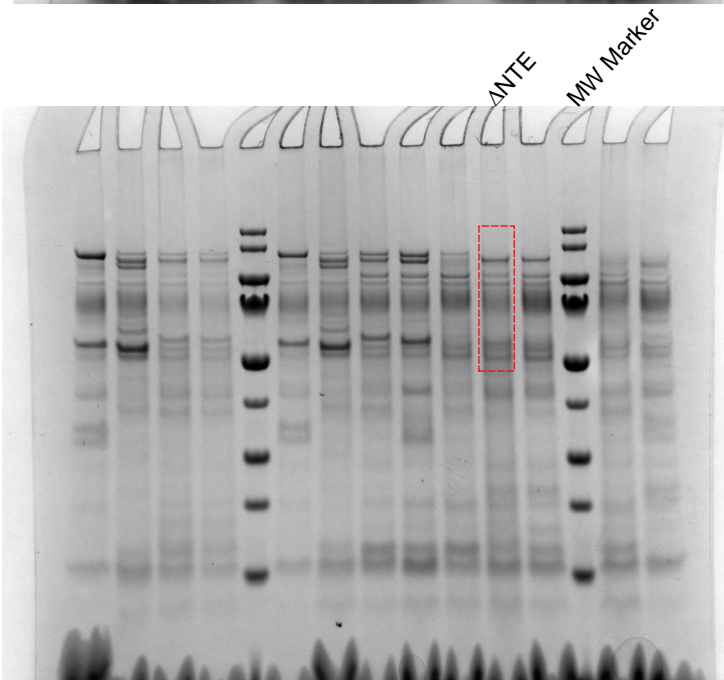

Extended Data Fig. 6b

Supplement: EMS118387-supplement-Uncropped_EDFig6b_pdf.pdf [file EMS118387-supplement-Uncropped_EDFig6b_pdf.pdf]

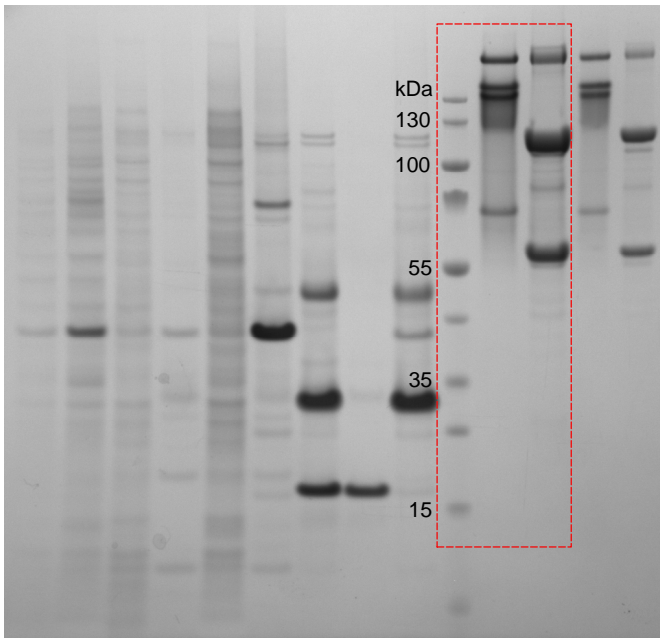

Fig. 1a

Supplement: EMS118387-supplement-Uncropped_Fig1a_pdf.pdf [file EMS118387-supplement-Uncropped_Fig1a_pdf.pdf]
